# Supplementary material for: A Role for the Malignant Brain Tumour (MBT) Domain Protein LIN-61 in DNA Double-Strand Break Repair by Homologous Recombination
Source: PubMed Central journal article supplement (PMC3591299; doi:10.1371/journal.pgen.1003339), 2013-03-07

**A**

```

MBTR-1 -----
LIN-61 MLKLVILCFALFYNTVSSSTRFLFGVEVKCDFDEVFQLTVSHWEDDGNTFWDRDEDITGRM 60

MBTR-1 --MEKSSSNFIQNGKR-----DHGGKLRQYNYKLEEAERYFTTEERLF 41
LIN-61 TMFARKKIFFYQDGHGHEFEGKLEPYGWFLHNCTKNGNFREYRHGLSSTSGSNGLEYIEY 120

MBTR-1 YRRRNPEVEKIAQRIPKPKQIEGTFTWSDELRCNYDGNTQFLPVEALEGCLPLEKLNQHLPK 101
LIN-61 TMSEFLKIVRANKKSDRKLDKTYLWESYLHQFEKGTSFIPVEAFNRNLTVN-FNECVKE 179
      .      *:: .. ::: *: *.. *:  .*.*.*.*****:: *:: :*: :*

MBTR-1 GFRLEVVRPSLDPSITTKSPEIRWFGEVTAVCGFYVAIKFVGELNRRPCWFHMLSEDIF 161
LIN-61 GVIFETVVH---DYDKNCDSIQVRWFARIEKVCYRVLAQFIGADTK--FWLNILSDDMF 234
      * . :*.**:* * . . * :***..: ***: * :*: * . : *::**:*:*

MBTR-1 DIGSGLKQDPAMKWLQYR-PLSLLKPMQCPKFWRRGSTPAPPVPRPTEEILDEFQAELHE 220
LIN-61 GLANAAMSDPNMDKIVYAPPLAINEEYQN-----DMVNYVNNCIDGEIVG 279
      ..... .** * . : * *::: : * . : : : : : : *

MBTR-1 NRISEPKIFDQLRHLAHRPSRFLNQRVELLNYLEPTEIRVARILRILGRRLMVMVTAQD 280
LIN-61 -QTSLSPKFDEGKALLSK-HRFKVGQRELLNYSNSTEIRVARIQEICGRMNVSITTKD 337
      : * . **:* : * : **::**.***.* : .***** * * **:* : * : *

MBTR-1 YPEDLPSVEAKDRQVQHENVEFWDESSFFLFPVGFAMINGLRTKATEGYLEHSRRIAEG 340
LIN-61 FPESLPDADD-DRQVSSGSQYWIDEGSFFIFPVGFAAVNGYQLNAKKEYIEHTNKIAQA 396
      :**.**.**..: **** .. :*:**.***.***.***.* ** : * : * . : *::**:*

MBTR-1 SGS-----YHKDDVTFEQLFAGKPDISAEKLNLLKVGQKFELLDPLSDLRQSFCVATIRK 395
LIN-61 IKNGENPRYDSDDVTFDQLAKDP--IDPMIWRKVKVGQKFELIDPLAQQFNNLHVASILK 454
      .      * . ***** ** . *.. . :*****.***:* : : : * : * *

MBTR-1 ICKTPGFLIISPDETESDDESFPIHIDNHFMHPVGYAEKFGIKLDRLAGTEPGKFKWEGY 455
LIN-61 FCKTEGYLIVGMDGPDALEDSFPIHINTFMPVGYAEKYNLELVPPD-EFKGTFRWDEY 513
      :*** *:*:* . * . : : : ***** ** * . ***** : : : * * . * : *

MBTR-1 LKEKQAEKIPDEMLRPLPSKERRHMFEGRVLEAVGQNETYWISPASVEEVHGRTVLIEF 515
LIN-61 LEKESAETLPLDLFKPMPSQERLDKFKVGLRLEAADMCENQFICPATVKSVHGRLINVNF 573
      *:::.*.*:* : : : *:*:* * . * : * * **.. * . :*.***:*.***.* : : : *

MBTR-1 QGWDESEFSELYDMDSHDLLPAGWCEFFNFKLRHPVLPVNDPNAENGEYD 564
LIN-61 DGWDEEFDELYDVDSHDILPIGWCEAHSYVLQP-----PKKYN--Y- 612
      :***.*.*.***.***.***.*** * ** * . : : * : * * *

```

**B**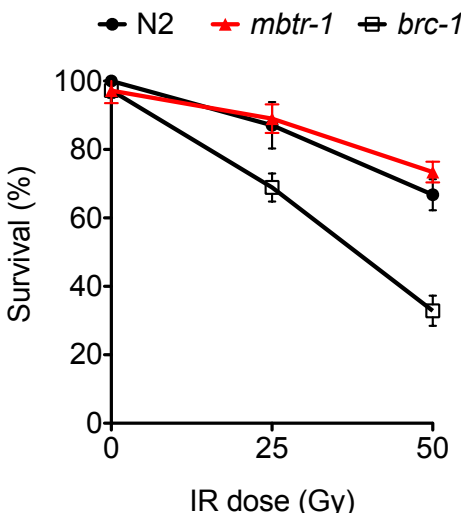

Supplement: pgen.1003339.s002.pdf [file pgen.1003339.s002.pdf]
