# Supplementary material for: A Role for the Malignant Brain Tumour (MBT) Domain Protein LIN-61 in DNA Double-Strand Break Repair by Homologous Recombination
Source: PubMed Central journal article supplement (PMC3591299; doi:10.1371/journal.pgen.1003339), 2013-03-07

**A**XF460 (HR reporter with donor *gfp* sequences)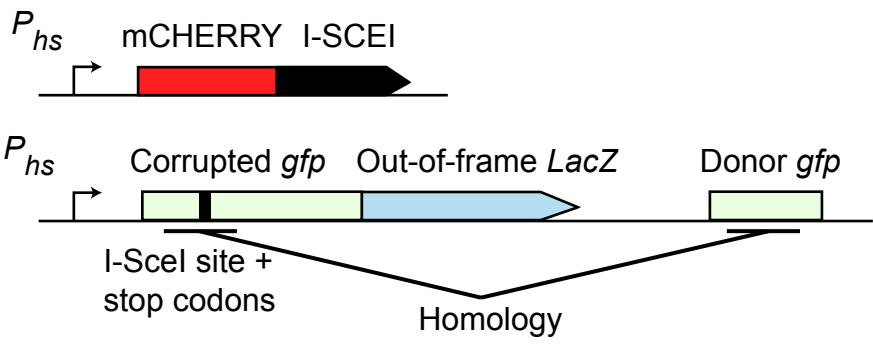XF444 (HR reporter with donor *gfp* sequences deleted)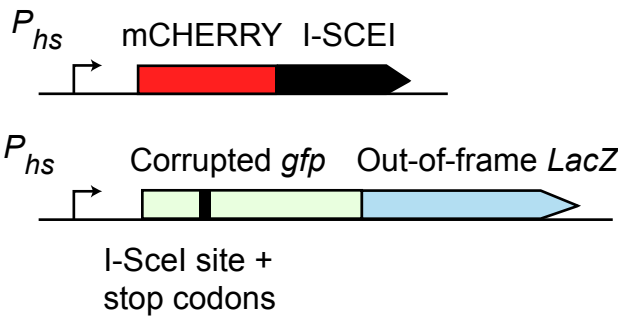**B**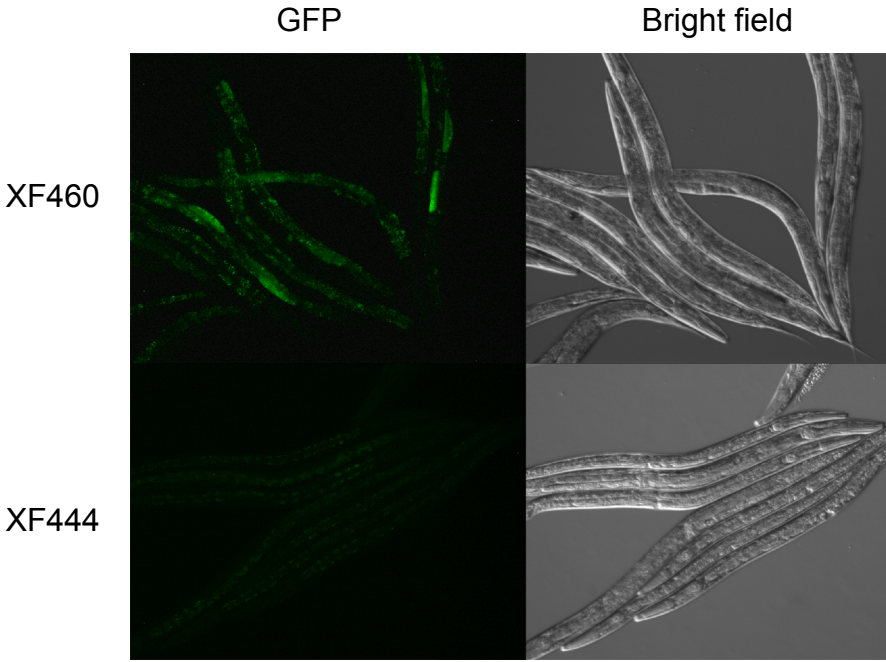

Supplement: pgen.1003339.s005.pdf [file pgen.1003339.s005.pdf]
